# Supplementary material
Source: PubMed Central journal article supplement (PMC2841883)
Supplement: 1000963107_pnas.201000963SI.pdf [file 1000963107_pnas.201000963SI.pdf]

# Supporting Information

González-Pérez et al. 10.1073/pnas.1000963107

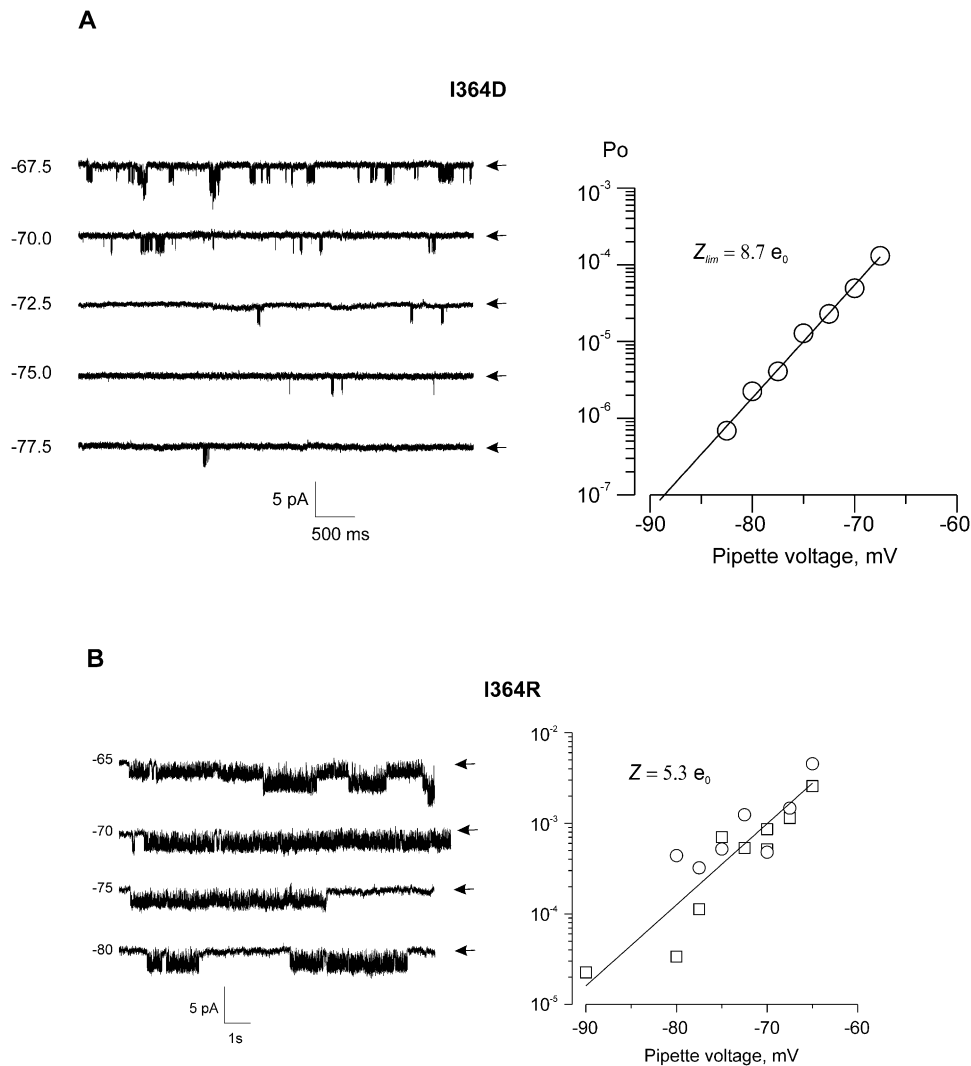

**Fig. S1.** Limiting slope analysis of mutants I364D and I364R. (A) Five-second fragments representative of a 5-min recording (Left) and analysis of the I364D variant (Right). Voltages stepped every 2.5 mV are shown on the left of each trace. Records were acquired as described in the main text (Materials and Methods). Relative open probability (NPo) was estimated from the fractional time the current trace showed 0, 1, 2... single-channel open levels. Right: Absolute Po vs. V plot (Po calculated from NPo/N; N was estimated from the nonstationary fluctuation analysis as in Fig. 2 in the main text. Data points were fitted to the function  $Po(V) = \exp(Z_{lim} V/kT)$ , where  $Z_{lim}$  is the effective valence of opening. Average of data from three patches gave  $z = 9.0 \pm 0.5$  (mean  $\pm$  SD). (B) Left: Segments extracted from 10-min traces recorded from membrane macropatches having hundreds of I364R channels. NPo and N were estimated as in Fig. 2 of the main text. Traces are not representatives for Po; instead, they were chosen to illustrate extreme long burst duration of this variant. Right: Absolute Po vs. V plot (Po calculated from NPo/N) containing data superimposed for three different patches. Each data point corresponds to a 10-min Po measurement. The best fit to the pooled data gave  $z = 5.3 \pm 1.0$ .
